# Supplementary material for: Functional Role of AGAP2/PIKE-A in Fcγ Receptor-Mediated Phagocytosis
Source: MDPI journal article supplement (doi:10.3390/cells12010072), 2022-12-24
Supplement: s1 [file s1]

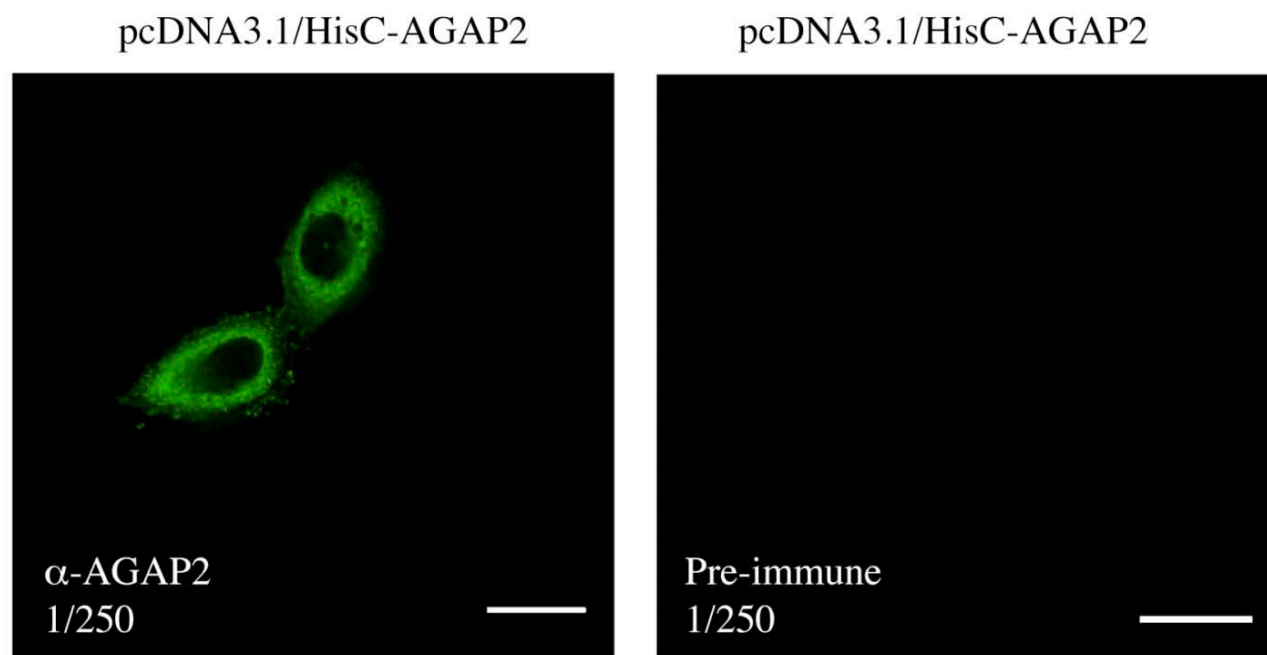

**Supplemental Figure S1.** Localization of pcDNA3.1/HisC-AGAP2 in CHO-IIA cells. CHO-IIA cells transiently transfected with pcDNA3.1/HisC-AGAP2 were labeled with anti-AGAP2 antibody 1/250 (left panel) or with the pre-immune serum at the same concentration (right panel). Cells were examined under confocal microscopy at the same settings and a single confocal cross section of cells is represented. Bars, 20 μm.
